# Supplementary material
Source: Research Square preprint supplement (doi:10.21203/rs.3.rs-9359986/v1)
Supplement: Supplementary file 1 [file 66248cbce2c88e879bd45ad5.xlsx]

## Sheet: Accession numbers
Accession number	Virus	Protein	Origin	Genus
NP_776259.1	Diarrea viral bovina 1	Npro	Washington, USA	Pestivirus
NP_777494.1	Fiebre porcina clásica	Npro	Mittelhaeusern, Suiza	Pestivirus
NP_777533.1	Enfermedad de las fronteras	Npro	Giessen, Alemania	Pestivirus
AEW50182.1	Dengue 4	Npro	Para, Brasil	Flavivirus
NP_776260.1	Diarrea viral bovina 1	Capsid	Washington, USA	Pestivirus
ARK38541.1	Diarrea viral bovina 3	Capsid	Porto Alegre, Brasil	Pestivirus
NP_777495.1	Fiebre porcina clásica	Capsid	Mittelhaeusern, Suiza	Pestivirus
NP_777534.1	Enfermedad de las fronteras	Capsid	Giessen, Alemania	Pestivirus
ABV54625.1	Pestivirus ovino	Capsid	Sophia-Antipolis, Francia	Pestivirus
NP_776262.1	Diarrea viral bovina 1	E1	Washington, USA	Pestivirus
QCB65264.1	Atypical porcine pestivirus	E1	Jiangsu, China	Pestivirus
ARK38541.1	Diarrea viral bovina 3	E1	Porto Alegre, Brasil	Pestivirus
AVA30713.1	Diarrea viral bovina 2	E1	Torino, Italia	Pestivirus
ATN39078.1	Diarrea viral bovina 1b	E1	Jilin, China	Pestivirus
NP_777497.1	Fiebre porcina clásica	E1	Mittelhaeursen, Suiza	Pestivirus
NP_777536.1	Enfermedad de las fronteras	E1	Giessen, Alemania	Pestivirus
AAW88355.1	Diarrea viral bovina 1 Ind S1226	E1	Bhopal, India	Pestivirus
AAR83680.1	Tunisian sheep virus	E1	Tunis, Tunisie	Pestivirus
AAK56854.1	Diarrea viral bovina Braidwood	E1	Nueva Gales del Sur, Australia	Pestivirus
AAC06278.2	Diarrea viral bovina Bega	E1	Nueva Gales del Sur, Australia	Pestivirus
AAC06279.2	Diarrea viral bovina Trangie Y546	E1	Nueva Gales del Sur, Australia	Pestivirus
NP_776263.1	Diarrea viral bovina 1	E2	Washington, USA	Pestivirus
NP_777498.1	Fiebre porcina clásica	E2	Mittelhaeusern, Suiza	Pestivirus
NP_777537.1	Enfermedad de las fronteras	E2	Giessen, Alemania	Pestivirus
NP_776265.1	Diarrea viral bovina 1	p7	Washington, USA	Pestivirus
NP_777500.1	Fiebre porcina clásica	p7	Mittelhaeursen, Suiza	Pestivirus
NP_777539.1	Enfermedad de las fronteras	p7	Giessen, Alemania	Pestivirus
YP_009506362.1	Hepacivirus M	p7	Nueva York, USA	Hepacivirus
YP_009325330.1	Bat hepacivirus	p7	Nueva York, USA	Hepacivirus
AAD41725.1	Diarrea viral bovina 2	p7	Giessen, Alemania	Pestivirus
NP_776266.1	Diarrea viral bovina 1	NS2-3	Washington, USA	Pestivirus
NP_777501.1	Fiebre porcina clásica	NS2-3	Mittelhaeursen, Suiza	Pestivirus
NP_777540.1	Enfermedad de las fronteras	NS2-3	Giessen, Alemania	Pestivirus
AIE38087.1	Diarrea viral bovina 1-NADL	NS2-3	Buenos Aires, Argentina	Pestivirus
NP_776267.1	Diarrea viral bovina 1	NS3	Washington, USA	Pestivirus
AAB04812.1	GB virus C	NS3	Heidelberg, Alemania	Pegivirus
NP_777502.1	Fiebre porcina clásica	NS3	Mittelhaeuersen, Suiza	Pestivirus
AAP78942.1	Kunjin virus	NS3	Queensland, Australia	Flavivirus
AAK67712.1	Dengue 2	NS3	Queensland, Australia	Flavivirus
ARB07984.1	Zika	NS3	Cambridge, USA	Flavivirus
NP_776018.1	West Nile virus	NS3	Giessen, Alemania	Flavivirus
NP_775670.1	Japanese encephalitis virus	NS3	Washington, USA	Flavivirus
AIE38087.1	Diarrea viral bovina 1-NADL	NS3	Buenos Aires, Argentina	Pestivirus
ACX42224.2	Diarrea viral bovina 2	NS3	Jilin, China	Pestivirus
AAM91913.1	Diarrea viral bovina 2-New York '93	NS3	Tubingen, Alemania	Pestivirus
YP_009179227.1	Wenling shark virus	NS3	Washington, USA	Hepacivirus
NP_056931.1	Hepatitis GB virus B	NS3	Washington, USA	Hepacivirus
YP_007697649.1	Equine pegivirus 1	NS3	Nueva York, USA	Pegivirus
YP_001008348.1	Saint Louis encephalitis	NS3	Nueva York, USA	Flavivirus
AMK47901.1	Culex flavivirus	NS3	Sao Paulo, Brasil	Flavivirus
YP_009164031.1	Mercadeo virus	NS3	Panama, Panama	Flavivirus
YP_009259489.1	Hanko virus	NS3	Helsinki, Finlandia	Flavivirus
AAC77906.1	Diarrea viral bovina Rit 4350	NS3	Giessen, Alemania	Pestivirus
AKT04586.1	Hepacivirus C	NS3	Ridgefield, USA	Hepacivirus
AHG23200.1	Dengue 1	NS3	Cambridge, USA	Flavivirus
AEV46286.1	Hepacivirus C 3	NS3	Islamabad, Pakistan	Hepacivirus
AYP74868.1	Quang Binh virus	NS3	Guangdond, China	Flavivirus
YP_009553010.1	Culex theileri flavivirus	NS3	San Francisco, USA	Flavivirus
YP_009352228.1	Ochlerotatus caspius flavivirus	NS3	Ankara, Turkia	Flavivirus
YP_007877501.1	Mosquito flavivirus	NS3	Beijing, China	Flavivirus
NP_658908.1	Tamana bat virus	NS3	Merseille, Francia	Flavivirus
YP_009256193.1	Culiseta flavivirus	NS3	New Haven, USA	Flavivirus
AWF71072.1	Fiebre amarilla	NS3	Durham, USA	Flavivirus
ACV04605.2	Nakiwogo virus	NS3	Londres, UK	Sin clasificación
YP_009344962.1	Palm Creek virus	NS3	Queensland, Australia	Flavivirus
YP_009389296.1	Mac Peak virus	NS3	Queensland, Australia	Sin clasificación
ATL63282.1	La Tina virus	NS3	Antioquia, Colombia	Flavivirus
ATN29922.1	Long Pine Key virus	NS3	Antioquia, Colombia	Flavivirus
ASD50161.1	Haslams Creek virus	NS3	Queensland, Australia	Sin clasificación
ASD50159.1	Karumba virus	NS3	Queensland, Australia	Sin clasificación
ABL64013.1	Hepacivirus C	NS3	Western Australia, Aus	Hepacivirus
NP_777541.1	Border disease virus	ns3	Bethesda, USA	Pestivirus
NP_776268.1	Diarrea viral bovina 1	NS4a	Washington, USA	Pestivirus
NP_777503.1	Fiebre porcina clásica	NS4a	Mittelhaeursern, Suiza	Pestivirus
NP_777542.1	Enfermedad de las fronteras	NS4a	Giessen, Alemania	Pestivirus
NP_776269.1	Diarrea viral bovina 1	NS4b	Washington, USA	Pestivirus
NP_777504.1	Fiebre porcina clásica	NS4b	Mittelhaeursen, Suiza	Pestivirus
NP_777543.1	Enfermedad de las fronteras	NS4b	Giessen, Alemania	Pestivirus
AIE38087.1	Diarrea viral bovina 1-NADL	NS4b	Buenos Aires, Argentina	Pestivirus
AAF73908.1	Diarrea viral bovina 1-CP821	NS4b	Giessen, Alemania	Pestivirus
AAF73910.1	Diarrea viral bovina 1-NCP821	NS4b	Giessen, Alemania	Pestivirus
NP_776270.1	Diarrea viral bovina 1	NS5a	Washington, USA	Pestivirus
NP_777505.1	Fiebre porcina clásica	NS5a	Mittelhaeursen, Suiza	Pestivirus
NP_777544.1	Enfermedad de las fronteras	NS5a	Giessen, Alemania	Pestivirus
NP_056931.1	Hepatitis GB virus B	NS5a	Washington, USA	Hepacivirus
NP_042692.1	Hepacivirus B	NS5a	North Chicago, USA	Hepacivirus
YP_009506359.1	Hepacivirus I	NS5a	Bonn, Alemania	Hepacivirus
ADH82350.1	Hepatitis C 1a	NS5a	Chiang Mai, Tailandia	Hepacivirus
AMK92549.1	Hepacivirus C	NS5a	Punjab, Pakistan	Hepacivirus
AAF73910.1	Diarrea viral bovina 1-NCP821	NS5a	Giessen, Alemania	Pestivirus
NP_776271.1	Diarrea viral bovina 1	NS5b	Washington, USA	Pestivirus
NP_777506.1	Fiebre porcina clásica	NS5b	Mittelhaeursen, Suiza	Pestivirus
NP_777545.1	Enfermedad de las fronteras	NS5b	Giessen, Alemania	Pestivirus
AIE38087.1	Diarrea viral bovina 1-NADL	NS5b	Buenos Aires, Argentina	Pestivirus

## Sheet: Protein models
Npro
Virus	%Iden	Template
Diarrea viral bovina 1	0.6933	4h9k.1.A
Fiebre porcina clásica	0.9733	4h9k.1.A
Enfermedad de las fronteras	0.72	4h9k.1.A
Dengue 4	0.7091	5u4w.1.B
Capside
Virus	%Iden	Templado
Diarrea viral bovina 1	0.3226	2lft.1.A prion
Diarrea viral bovina 3	0.1923	2l9h.1.A enterococus fecalis
Fiebre porcina clásica	0.1538	2l9h.1.A enterococus fecalis
Enfermedad de las fronteras	0.2903	2lsb.1.A prion
Pestivirus ovino	x	x
E1
Virus	%Iden	Templado
Diarrea viral bovina 1	0.3273	7jhy.1.H crispr
Atypical porcine pestivirus	0.1333	1wij.1.A ethylene
Diarrea viral bovina 3	0.2727	7jhy.1.H crispr
Diarrea viral bovina 2	0.3091	7jhy.1.H crispr
Diarrea viral bovina 1b	0.3091	7jhy.1.H crispr
Fiebre porcina clásica	0.2545	7jhy.1.H crispr
Enfermedad de las fronteras	0.2364	7jhy.1.H crispr
Diarrea viral bovina 1 Ind S1226	0.32	7jhy.1.H crispr
Tunisian sheep virus	0.2456	7jhy.1.H crispr
Diarrea viral bovina Braidwood	0.4	7jhy.1.H crispr
Diarrea viral bovina Bega	0.36	7jhy.1.H crispr
Diarrea viral bovina Trangie Y546	0.36	7jhy.1.H crispr
E2
Virus	%Iden	Templado
Diarrea viral bovina 1	0.8482	2yq2.1.A
Fiebre porcina clásica	0.6083	4jnt.1.A
Enfermedad de las fronteras	0.5791	2yq2.1.A
p7
Virus	%Iden	Templado
Diarrea viral bovina 1	x
Fiebre porcina clásica	x
Enfermedad de las fronteras	0.1111	5z07.1.A cenp-I
Hepacivirus M	x
Bat hepacivirus	x
Diarrea viral bovina 2	0.6545	4h9k.1.A
NS2-3
Virus	%Iden	Templado
Diarrea viral bovina 1	0.9004	5wx1.1.A
Fiebre porcina clásica	0.9956	5wx1.1.A
Enfermedad de las fronteras	0.9488	5wx1.1.A
NS3
Virus	%Iden	Templado
Diarrea viral bovina 1	0.9004	5wx1.1.A
GB virus C	0.6463	4wxp.1.A
Fiebre porcina clásica	0.9956	5wx1.1.A
Kunjin virus	0.9425	5idk.3.A
Dengue 2	0.7709	5yw1.1.A
Zika	0.6582	2whx.1.A
West Nile virus	0.8033	2wv9.1.A
Japanese encephalitis virus	0.8595	2wv9.1.A
Diarrea viral bovina 2	0.913	5wx1.1.A
Diarrea viral bovina 2-New York '93	0.9151	5wx1.1.A
Wenling shark virus	0.4429	3o8c.1.A
Hepatitis GB virus B	0.4527	3o8d.1.A
Equine pegivirus 1	0.3968	4a92.1.A
Saint Louis encephalitis	0.7263	2wv9.1.A
Culex flavivirus	0.3327	2wv9.1.A
Mercadeo virus	0.2967	2wv9.1.A
Hanko virus	0.3345	2whx.1.A
Diarrea viral bovina Rit 4350	0.9078	5wx1.1.A
Dengue 1	0.8207	2jls.1.A
Hepacivirus C 3	0.79	5wdx.1.A
Quang Binh virus	0.3333	2whx.1.A
Culex theileri flavivirus	0.321	2wv9.1.A
Ochlerotatus caspius flavivirus	0.3431	2wv9.1.A
Mosquito flavivirus	0.331	2whx.1.A
Tamana bat virus	0.3261	2whx.1.A
Culiseta flavivirus	0.3081	2whx.1.A
Fiebre amarilla	0.9207	1yks.1.A
Nakiwogo virus	0.3376	5yw1.1.A
Palm Creek virus	0.3686	5yw1.1.A
Mac Peak virus	0.3223	2whx.1.A
La Tina virus	0.3275	5yw1.1.A
Long Pine Key virus	0.5613	2wv9.1.A
Haslams Creek virus	0.3258	2whx.1.A
Karumba virus	0.3235	2whx.1.A
Hepacivirus C	0.9152	1cu1.1.A
Border	0.9488	5wx1.1.A
DIARREA VIRAL
NS4a
Virus	%Iden	Templado
Diarrea viral bovina 1	0.725	5mz4.1.A
Fiebre porcina clásica	0.9	5mz4.1.A
Enfermedad de las fronteras	0.775	5mz4.1.A
NS4b
Virus	%Iden	Templado
Diarrea viral bovina 1	0.9443	ncp
Fiebre porcina clásica	0.7742	ncp
Enfermedad de las fronteras	0.7774	ncp
Diarrea viral bovina 1-CP821	0.7843	5mz4.1.A
Diarrea viral bovina 1-NCP821	0.2829	5mz4.1.A
NS5a
Virus	%Iden	Templado
Diarrea viral bovina 1	0.1835	2ajm.1
Fiebre porcina clásica	0.1651	2ajm.1
Enfermedad de las fronteras	0.1376	2ajm.1
Hepatitis GB virus B	0.3786	3ske.1.A
Hepacivirus B	0.381	4khn.1.A
Hepacivirus I	0.3824	4adp.1.A
Hepatitis C 1a	0.9294	2ajm.1
Hepacivirus C	0.7176	2ajm.1
Diarrea viral bovina 1-NCP821	0.4138	2ajm.1
NS5b
Virus	%Iden	Templado
Diarrea viral bovina 1	0.9984	1s48.1.A
Fiebre porcina clásica	0.9912	5yf6.1.A
Enfermedad de las fronteras	0.7988	5yf6.1.A
